# Supplementary material
Source: PubMed Central journal article supplement (PMC4249187)
Supplement: AEM.01795-14_zam999105833so1.pdf [file AEM.01795-14_zam999105833so1.pdf]

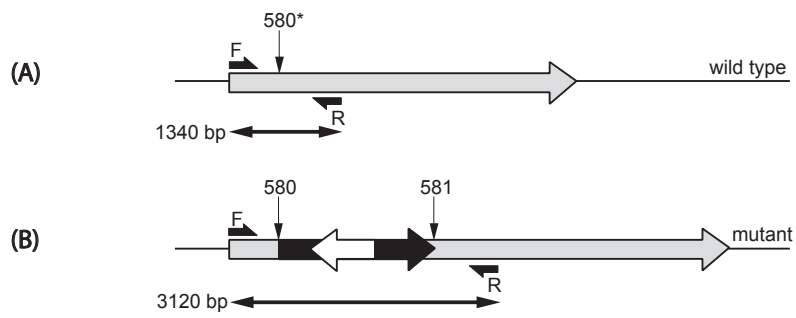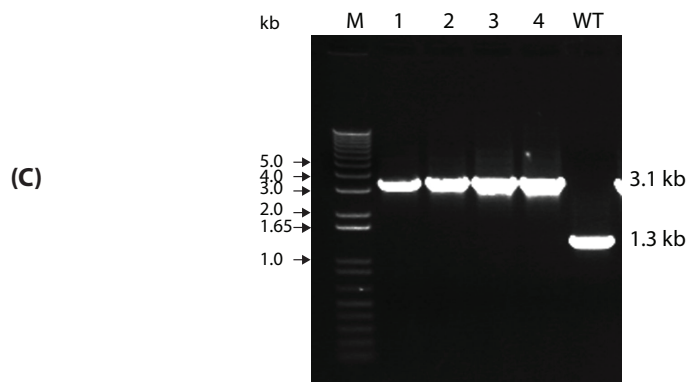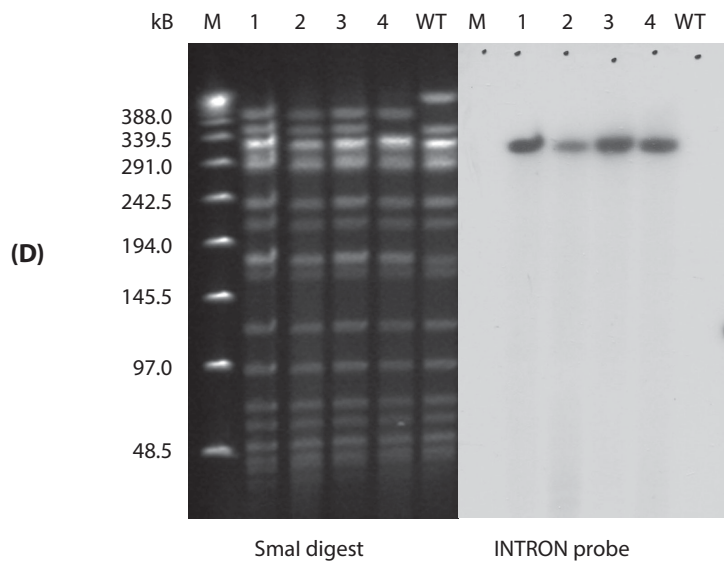

**Figure S1.** Analysis of the botulinum toxin mutant clones and the wild type *C.*

*botulinum* strain Hall A-*hyper*.

**(A and B)** Schematic presentation of the wild type (A) and mutated (B) botulinum neurotoxin genes. The ClosTron insertion site is shown with a vertical arrow and an asterisk. The locations of PCR primers F (LC/F) and R (LC/R) are shown with horizontal arrows on either side of the intron insertion site, and sizes of the expected size PCR products are indicated.

**(C)** PCR products of four randomly selected putative mutant clones (lanes 1 - 4) and wild-type strain Hall A-*hyper* (lane 5, wt). M, 1 kb Plus DNA ladder (Life Technologies); wt, wild type.

**(D)** Pulsed-field gel electrophoresis (PFGE) and Southern hybridization analysis of the toxin mutant clones and the wild type *C. botulinum* strain Hall A-*hyper*. Left panel, PFGE of *Sma*I digested chromosomal DNA; Right panel, Southern hybridization with the group II intron (ClosTron) probe specific to the erythromycin gene. Lanes 1 – 4, randomly selected putative mutant clones, lane 5, wild type strain Hall A-*hyper* (wt). M, lambda ladder, PFGE marker (New England Biolabs).
